# Supplementary material
Source: HighWire-hosted journal article supplement (https://bmjopen.bmj.com/content/8/1/e017681)
Supplement: inline-supplementary-material-1 [file inline-supplementary-material-1.pdf]

## **Appendix 1 - Search strategy (Via Ovid)**

1. surgery, maxillofacial.mp. or exp Surgery, Oral/
2. operative dentistry.mp. or exp Dentistry, Operative/
3. dentistry, operative.mp. or exp Dentistry, Operative/
4. prosthesis, surgical dental.mp. or Dental Implants/
5. prostheses, surgical dental.mp. or exp Dental Implants/
6. surgical dental prosthesis.mp. or exp Dental Implants/
7. surgical dental prostheses.mp. or exp Dental Implants/
8. dental prosthesis, surgical.mp. or exp Dental Implants/
9. dental prostheses, surgical.mp. or exp Dental Implants/
10. implant, dental.mp. or exp Dental Implants/
11. dental implant.mp. or exp Dental Implants/
12. implants, dental.mp. or exp Dental Implants/
13. dental implants.mp. or exp Dental Implants/
14. procedures, maxillofacial.mp. or exp Oral Surgical Procedures/
15. procedure, maxillofacial.mp. or exp Oral Surgical Procedures/
16. maxillofacial procedure.mp. or exp Oral Surgical Procedures/
17. maxillofacial procedures.mp. or exp Oral Surgical Procedures/
18. exodontics.mp. or exp Surgery, Oral/
19. procedure, oral surgical.mp. or exp Oral Surgical Procedures/
20. oral surgical procedure.mp. or exp Oral Surgical Procedures/
21. surgical procedures, oral.mp. or exp Oral Surgical Procedures/
22. procedures, oral surgical.mp. or exp Oral Surgical Procedures/
23. surgical procedures, oral.mp. or exp Oral Surgical Procedures/
24. oral surgical procedures.mp. or exp Oral Surgical Procedures/
25. oral surgery.mp. or exp Surgery, Oral/
26. maxillofacial surgery.mp. or exp Surgery, Oral/
27. surgery,oral.mp. or exp Surgery, Oral/

**28. 1 or 2 or 3 or 4 or 5 or 6 or 7 or 8 or 9 or 10 or 11 or  
12 or 13 or 14 or 15 or 16 or 17 or 18 or 19 or 20 or  
21 or 22 or 23 or 24 or 25 or 26 or 27**

- 29. benzodiazepinones.mp. or exp Benzodiazepinones/
- 30. Benzodiazepinones.mp. or exp Benzodiazepinones/
- 31. Alprazolam novopharm brand.mp. or exp Alprazolam/
- 32. novopharm brand of alprazolam.mp. or exp Alprazolam/
- 33. novo alprazol.mp. or exp Alprazolam/
- 34. novoalprazol.mp. or exp Alprazolam/
- 35. novo-alprazol.mp. or exp Alprazolam/
- 36. Alprazolam pfizer brand.mp. or exp Alprazolam/
- 37. pfizer brand of alprazolam.mp. or exp Alprazolam/
- 38. maleate, midazolam.mp. or exp Midazolam/
- 39. midazolam maleate.mp. or exp Midazolam/
- 40. midazolam.mp. or exp Midazolam/
- 41. effect, antianxiety.mp. or exp Anti-Anxiety Agents/
- 42. antianxiety effect.mp. or exp Anti-Anxiety Agents/
- 43. effects, anti-anxiety.mp. or exp Anti-Anxiety Agents/
- 44. anti anxiety effects.mp. or exp Anti-Anxiety Agents/
- 45. anti-anxiety effects.mp. or exp Anti-Anxiety Agents/
- 46. effect, anxiolytic.mp. or exp Anti-Anxiety Agents/
- 47. anxiolytic effect.mp. or exp Anti-Anxiety Agents/
- 48. effects, antianxiety.mp. or exp Anti-Anxiety Agents/
- 49. antianxiety effects.mp. or exp Anti-Anxiety Agents/
- 50. effects, anxiolytic.mp. or exp Anti-Anxiety Agents/
- 51. anxiolytic effects.mp. or exp Anti-Anxiety Agents/
- 52. effect,anti-anxiety.mp. or exp Anti-Anxiety Agents/
- 53. anti anxiety effect.mp. or exp Anti-Anxiety Agents/
- 54. anti-anxiety effect.mp. or exp Anti-Anxiety Agents/
- 55. anxiolytics.mp. or exp Anti-Anxiety Agents/
- 56. drugs, anti-anxiety.mp. or exp Anti-Anxiety Agents/
- 57. anti anxiety drugs.mp. or exp Anti-Anxiety Agents/

- 58. anti-anxiety drugs.mp. or exp Anti-Anxiety Agents/
- 59. minor tranquillizing agents.mp. or exp Anti-Anxiety Agents/
- 60. agents, minor tranquillizing.mp. or exp Anti-Anxiety Agents/
- 61. minor tranquilizing agents.mp. or exp Anti-Anxiety Agents/
- 62. agents, minor tranquilizing.mp. or exp Anti-Anxiety Agents/
- 63. tranquilizing agents, minor.mp. or exp Anti-Anxiety Agents/
- 64. agents, anxiolytic.mp. or exp Anti-Anxiety Agents/
- 65. anxiolytic agents.mp. or exp Anti-Anxiety Agents/
- 66. anti anxiety agents.mp. or exp Anti-Anxiety Agents/
- 67. agents, anti-anxiety.mp. or exp Anti-Anxiety Agents/
- 68. anti-anxiety agents.mp. or exp Anti-Anxiety Agents/
- 69. **29 or 30 or 31 or 32 or 33 or 34 or 35 or 36 or 37 or 38 or 39 or 40 or 41 or 42  
or 43 or 44 or 45 or 46 or 47 or 48 or 49 or 50 or 51 or 52 or 53 or 54 or 55 or  
56 or 57 or 58 or 59 or 60 or 61 or 62 or 63 or 64 or 65 or 66 or 67 or 68**
- 70. **69 and 28**
